# Supplementary material
Source: publisher figshare collection journal article supplement (https://acs.figshare.com/ndownloader/files/14289017)
Supplement: Supplementary file 1 [file 14289017]

**“Big Dipper” Dynamic Contact Angle Curves for Pt-Cured PDMS on a Thermal Gradient: Interrelationships of Hydrosilylation, Si-H Autoxidation and Si-OH Condensation to a Secondary Network.**

Kayesh M. Ashraf, Chenyu Wang, Sithara S. Nair and Kenneth J. Wynne\*

Department of Chemical and Life Science Engineering, Virginia Commonwealth University, Room 422, Biotech 8, 737 N 5th St, Richmond, Virginia 23219, United States.

**\*Corresponding author:** [kjwynne@vcu.edu](mailto:kjwynne@vcu.edu)

**Supporting Information**

**Calculation S1.** Penetration depth ( $d_p$ ) for Germanium (Ge) crystal

$$L = d_p = \frac{(\lambda)/n_c}{2 \times \pi \times [\sin^2 \theta - (\frac{n_s}{n_g})^2]^{1/2}}$$

$L$  = Diffusion path length =  $d_p$  = effective penetration depth

$\lambda$  = peak wavelength

$\theta$  = angle of incidence

$n_g$  = crystal refractive index

$n_s$  = PDMS refractive index

The Si-OH group has an absorbance peak at  $\sim 3500 \text{ cm}^{-1}$  (wavenumbers) which corresponds to  $\lambda = 2857 \text{ nm}$  (wavelength). For the Smart iTR instrument the angle of incidence is  $\theta = 45^\circ$ .

For the germanium crystal,  $n_g = 4.0$  for  $\lambda = 2857 \text{ nm} = 2.9 \text{ }\mu\text{m}$  which means:

$$\begin{aligned} L = d_p &= \frac{(2857 \text{ nm})/4}{2 \times \pi \times [\sin^2 45^\circ - (1.4/4)^2]^{1/2}} \\ &= 185 \text{ nm} \end{aligned}$$

The Si-H group has an absorbance peak at  $\sim 2150 \text{ cm}^{-1}$  (wavenumbers) which corresponds to  $\lambda = 4651 \text{ nm}$  (wavelength). So, the penetration depth ( $d_p$ ) for the Ge crystal

$$d_p = 301 \text{ nm}$$

**Calculation S2:** Calculation of mole ratios for the different base:crosslinker systems.

- a. Vinyl terminated polydimethylsiloxane (MW 28 kDa)

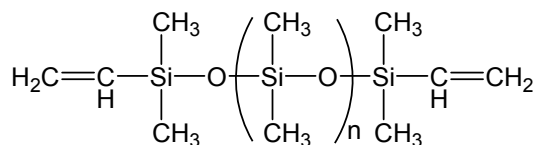

- b. Methylhydrosiloxanedimethylsiloxane copolymer, trimethylsiloxy terminated

[crosslinker] (MW 900-1200 Da, approximated to 1 kDa, SiO(H)(CH<sub>3</sub>) 50-55 mole%)

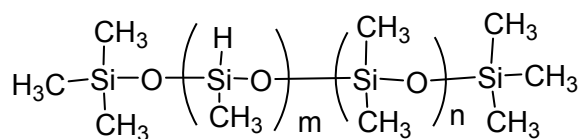

Number of repeat units of SiO(CH<sub>3</sub>)<sub>2</sub> in 'a' = 377

Number of repeat units of SiO(H)CH<sub>3</sub> in 'b' = 7 (based on 1 kDa molecular weight and 52.5 mol% of SiO(H)CH<sub>3</sub>)

**For 10:1 PDMS coatings:**

Hence, ratio of SiO(CH<sub>3</sub>)<sub>2</sub> to SiO(H)CH<sub>3</sub> :

$$377 \times \frac{10}{28000} : 7 \times \frac{1}{1000} \\ = \mathbf{19:1}$$

Ratio of SiO(CH<sub>3</sub>)<sub>2</sub>CH=CH<sub>2</sub> to SiO(H)CH<sub>3</sub> :

$$2 \times \frac{10}{28000} : 7 \times \frac{1}{1000} \\ = \mathbf{1:10}$$

2 repeat units of SiO(CH<sub>3</sub>)<sub>2</sub>CH=CH<sub>2</sub> is approximate, taking into account end groups of 'a'.

**Table S1.** Temperature and heating times for S-PDMS and Pt-PDMS coverslip coatings cured on thermal gradients.<sup>a</sup>

| Sample ID <sup>c,d</sup>          | Temperature (°C), time (h) S1 <sup>b</sup> | Temperature, (°C), time (h) S2 <sup>b</sup> | Temperature (°C), time (h) S1 <sup>b</sup> | Temperature, (°C), time (h) S2 <sup>b</sup> |
|-----------------------------------|--------------------------------------------|---------------------------------------------|--------------------------------------------|---------------------------------------------|
| S-PDMS(45)<br>Pt-PDMS(45)         | 45, 96                                     | 45, 48                                      | -                                          | -                                           |
| S-PDMS(140)<br>Pt-PDMS(140)       | 140, 48                                    | 140, 24                                     | -                                          | -                                           |
| S-PDMS(45-140)<br>Pt-PDMS(45-140) | 45, 24                                     | 45, 12                                      | 140, 24                                    | 140, 12                                     |
| S-PDMS(45-140)<br>Pt-PDMS(45-140) | 45, 48                                     | 45, 24                                      | 140, 48                                    | 140, 24                                     |
| S-PDMS(45-140)<br>Pt-PDMS(45-140) | 45, 96                                     | 45, 48                                      | 140, 96                                    | 140, 48                                     |

a. Processing conditions are the same for S-PDMS and laboratory prepared Pt-PDMS (Experimental).

b. S1 and S2 refer to coverslip sides.

c. (45) and (140) indicate cure temperature.

d. Gradients are designated S-PDMS(45-140) or Pt-PDMS(45-140).

**Table S2:** XPS area calculation for Si 2p peak.

| Binding energy (eV) | Area <sup>1</sup> | Area %* |
|---------------------|-------------------|---------|
| 101.5               | 19221             | 96      |
| 102.5               | 800               | 4       |

Area<sup>1</sup> total: 20021

Area<sup>2</sup> : 20139

% area difference = 0.6%

| Binding energy (eV) | Area <sup>1</sup> | Area %* |
|---------------------|-------------------|---------|
| 101.5               | 18836             | 96      |
| 102.5               | 883               | 4       |

Area<sup>1</sup> total: 18255

Area<sup>2</sup> : 18419

% area difference = 0.9%

<sup>1</sup>Determined by CASA v 2.3.16 PR 1.6

<sup>2</sup>Determined by Avantage 4.4

$$*Area\% = \frac{Area(1) + Area(2)}{Area(total)}$$

**Table S3.** Comparison of  $\theta_A$  and  $\theta_R$  for Pt-PDMS(45-140) coatings on coverslips prepared at two different times. The  $\theta_A$  is always high irrespective of cure conditions but the  $\theta_R$  increases as the cure time increases.

|                        | $\theta_A$ | $\theta_R$ |
|------------------------|------------|------------|
| Ist set of DCA samples |            |            |
| Pt-PDMS(45-140)-24/12  | 116        | 43         |
| Pt-PDMS(45-140)-48/24  | 113        | 55         |
| Pt-PDMS(45-140)-96/48  | 116        | 68         |
| 2nd set of DCA samples |            |            |
| Pt-PDMS(45-140)-24/12  | 92         | 28         |
| Pt-PDMS(45-140)-48/24  | 100        | 45         |
| Pt-PDMS(45-140)-96/48  | 105        | 60         |

**Table S4.** Average  $\theta_A$  and  $\theta_R$  for S-PDMS and Pt-PDMS coatings measured by drop addition-withdrawal (A-W) method at different cure times that correspond to images in **Figures 9, S8 and S9**.

| Sample designations      | Cure time | $\theta_A$ | $\theta_R$ | $\theta_\Delta$ |
|--------------------------|-----------|------------|------------|-----------------|
| S-PDMS(45)               | 96 h      | 125        | <b>45</b>  | 80              |
| S-PDMS(140)              | 48 h      | 110        | 92         | 18              |
| S-PDMS( <b>45</b> -140)  | 24 h      | 117        | <b>44</b>  | 73              |
| S-PDMS(45- <b>140</b> )  | 24 h      | 117        | 105        | 12              |
| S-PDMS( <b>45</b> -140)  | 48 h      | 113        | <b>47</b>  | 66              |
| S-PDMS(45- <b>140</b> )  | 48 h      | 113        | 107        | 6               |
| S-PDMS( <b>45</b> -140)  | 96 h      | 113        | <b>48</b>  | 65              |
| S-PDMS(45- <b>140</b> )  | 96 h      | 113        | 106        | 7               |
| Pt-PDMS(45)              | 96 h      | 122        | <b>47</b>  | 75              |
| Pt-PDMS(140)             | 48 h      | 110        | 100        | 10              |
| Pt-PDMS( <b>45</b> -140) | 24 h      | 114        | <b>51</b>  | 63              |
| Pt-PDMS(45- <b>140</b> ) | 24 h      | 114        | 100        | 14              |
| Pt-PDMS( <b>45</b> -140) | 48 h      | 114        | <b>52</b>  | 62              |
| Pt-PDMS(45- <b>140</b> ) | 48 h      | 114        | 99         | 15              |
| Pt-PDMS( <b>45</b> -140) | 96 h      | 112        | <b>53</b>  | 59              |
| Pt-PDMS(45- <b>140</b> ) | 96 h      | 112        | 96         | 16              |

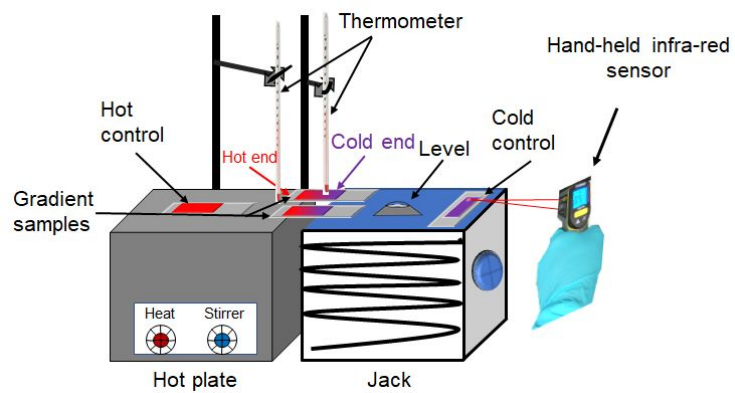

**Figure S1.** Experimental apparatus for the preparation of coatings cured in a 45 – 140 °C thermal gradient.



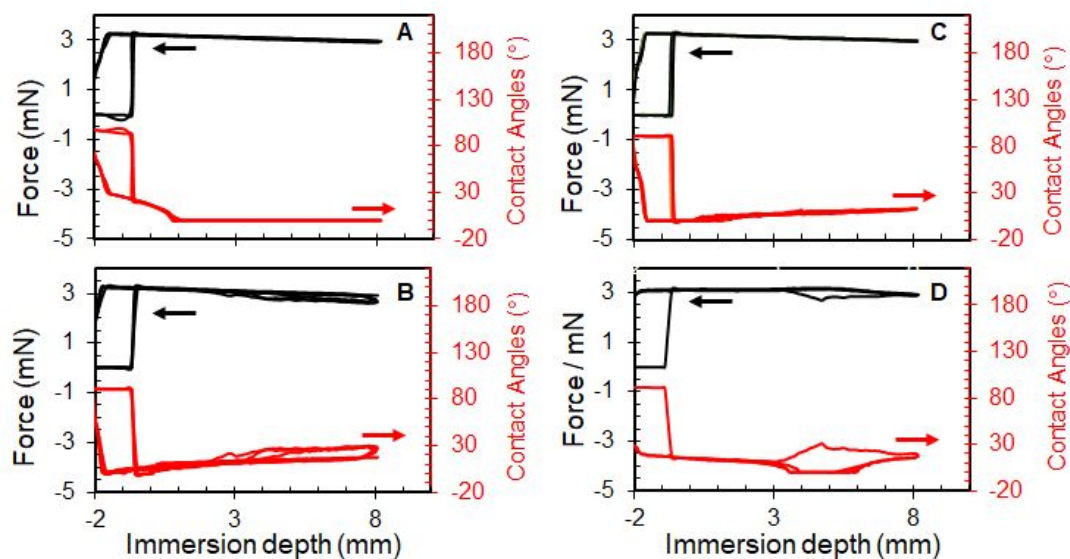

**Figure S2.** Three cycles comprising pre- and post-water check by DCA with a flamed glass slide for S-PDMS(45-140) and Pt-PDMS(45-140) gradients ( $T_{\text{cure}}$ :48/24 h). Black: force distance curves (fdc), Red: contact angles. **A**, pre-check; **B**, post-check of S-PDMS(45-140) gradient, **C**, pre-check; **D**, post-check of Pt-PDMS(45-140) gradient. A detailed procedure has been published: Uilk, J. M. M., A. E.; Fox, R. B.; Wynne, K. J., Hydrosilation-cured poly(dimethylsiloxane) networks: Intrinsic contact angles via dynamic contact angle analysis. *Macromolecules* **2003**, 36 (10), 3689–3694.

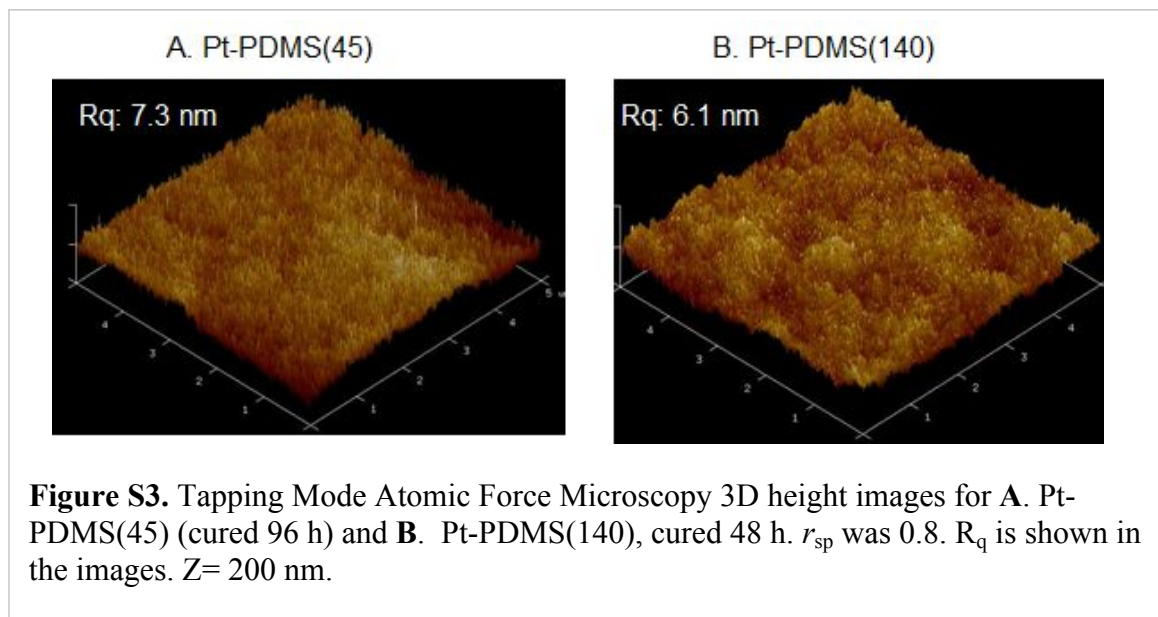

## Peak deconvolution

The peak area was calculated using smart background correction. The area difference between two different area measurement programs, Avantage and CASA software, were in agreement within <1%. The difference in area when the broad Si 2p peak was fitted with just one peak (light purple within red curve) was found to be >3% (**Figure S4**). This comparison supports the existence of two peaks from two Si species in the system as shown in **Figure 3**, as the area match was within 1%.

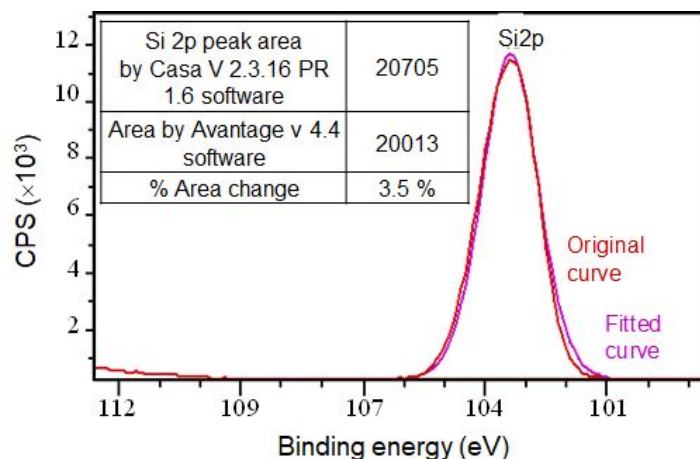

**Figure S4.** Si 2p peak (red) fitted with only one peak (purple curve). Inset shows the area under Si 2p peak calculated by using Casa and Avantage software. The two peak fit shown and discussed in the text is a better fit (**Figure 3**).

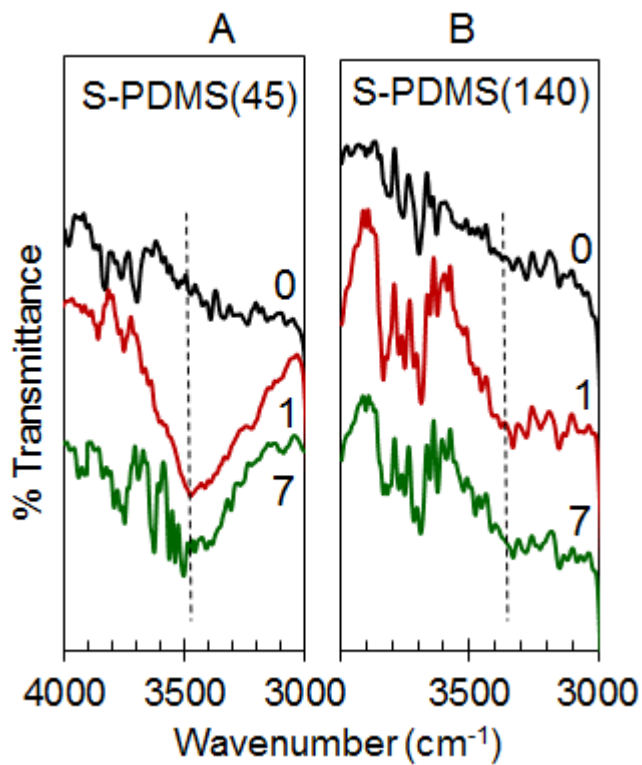

**Figure S5.** ATR-IR spectra for S-PDMS coatings prepared on microscope slides uniformly cured at 45 or 140 °C. Absorptions for Si-OH at  $\sim 3450$  cm<sup>-1</sup> before (0) and after immersion cycles 1 and 7. Each cycle consisted of immersion in water for 10 min followed by drying (1 min) in N<sub>2</sub> and drying in air for 6 h.

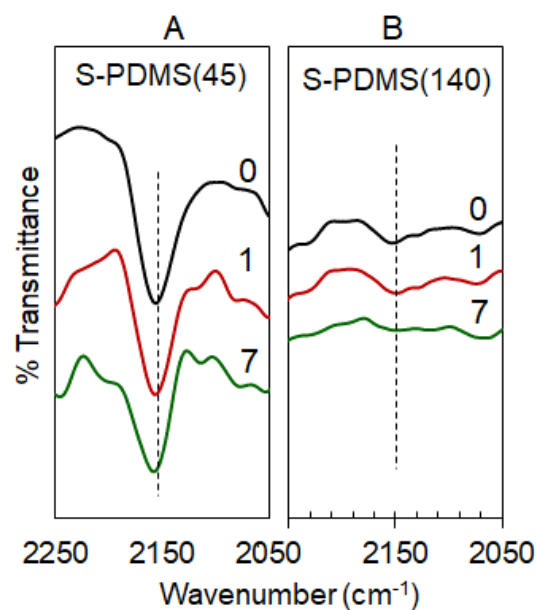

**Figure S6.** ATR-IR spectra of S-PDMS coatings prepared on microscope slides uniformly cured at 40 or 140 °C. Absorptions for Si-H at  $\sim 2150\text{ cm}^{-1}$  before and after immersion in water. Cycle numbers 1 and 7 are indicated. Each cycle consisted of immersion in water for 10 min followed by drying (1 min) in  $\text{N}_2$  and drying in air for 6 h.

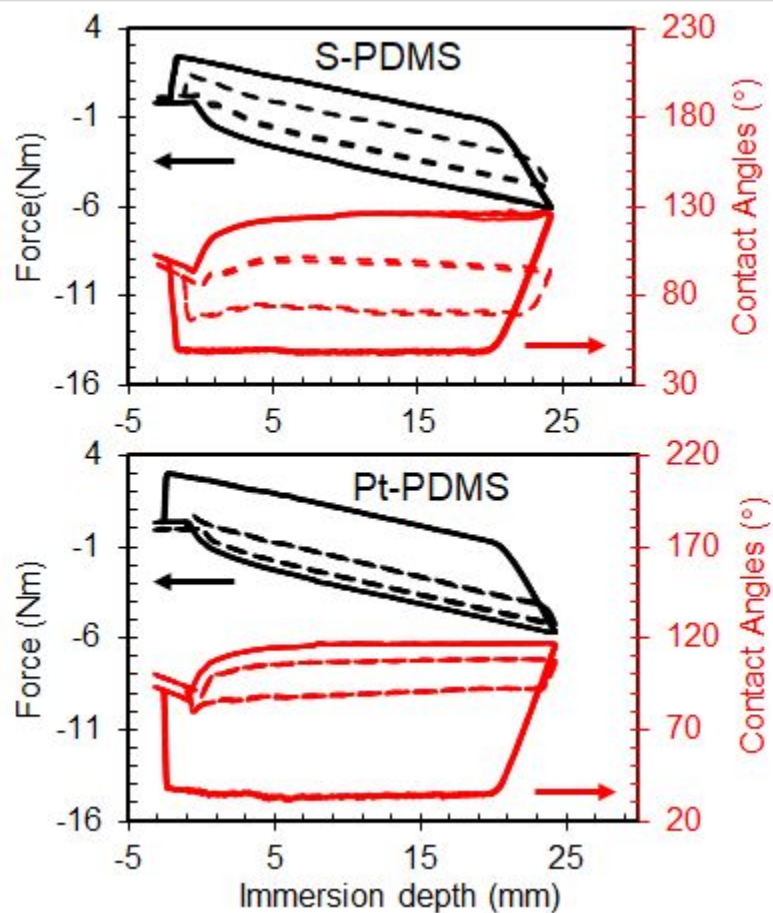

**Figure S7.** DCA data: **A**, S-PDMS(45) (solid line) and S-PDMS(140) (dashed line); **B**, Pt-PDMS(45) (solid line) and Pt-PDMS(140) (dashed line). Four DCA and force-distance curves in sequence are superposed.

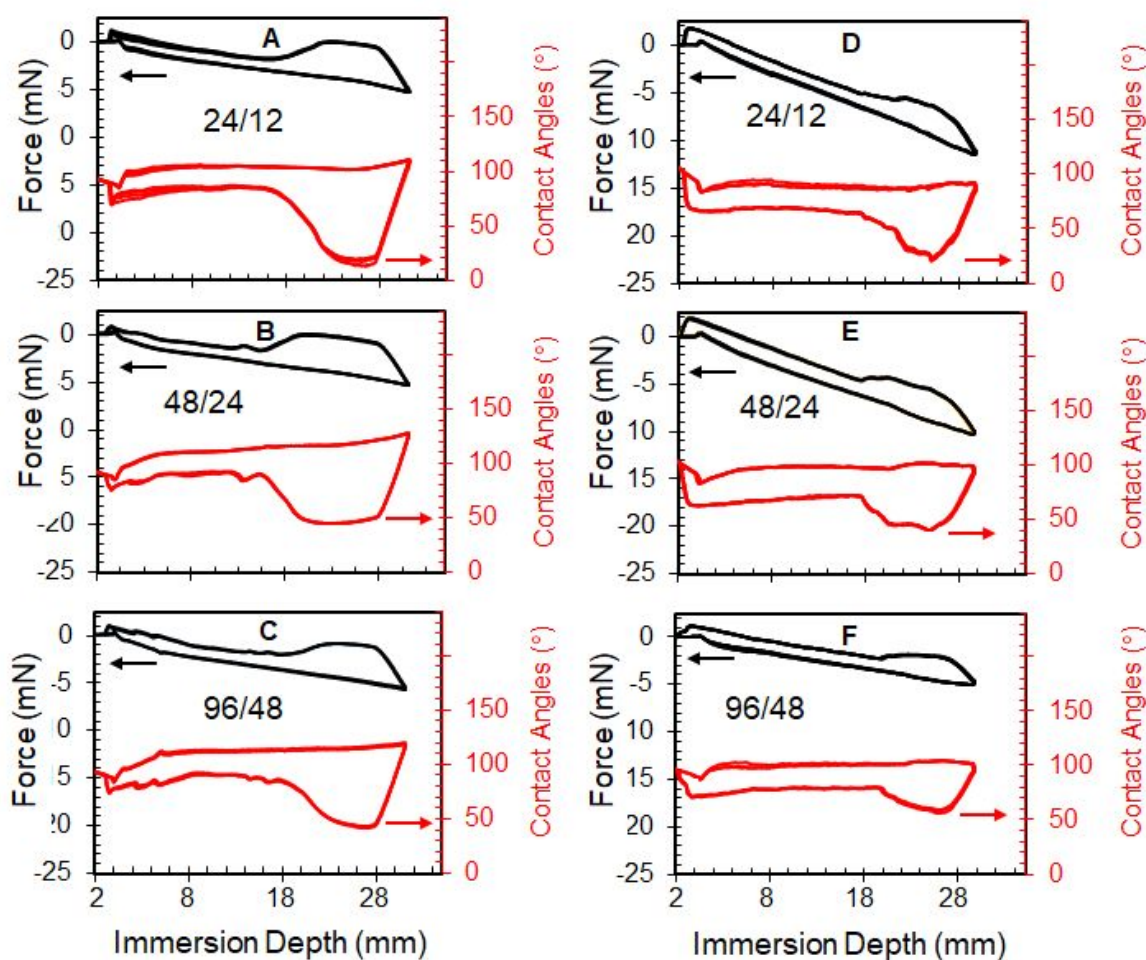

**Figure S8.** Force distance curves (fdc's, black) and contact angles (degrees, red), for gradients: **A**, S-PDMS(45-140)-24/12; **B**, S-PDMS(45-140)-48/24; **C**, S-PDMS(45-140)-96/48; **D**, Pt-PDMS(45-140)-24/12; **E**, Pt-PDMS(45-140)-48/24; **F**, Pt-PDMS(45-140)-96/48. Curves are superposition of four cycles.

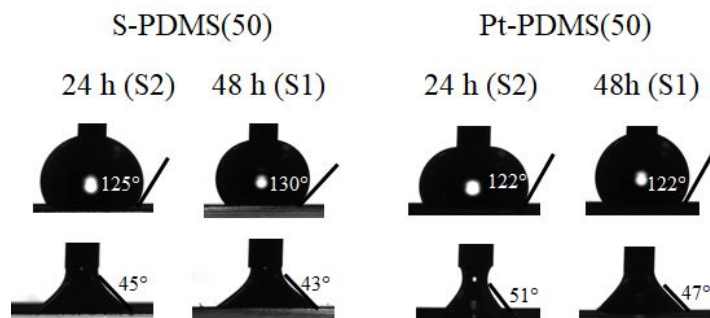

**Figure S9.**  $\theta_A$  and  $\theta_R$  for S-PDMS(50) and Pt-PDMS(50) coatings on coverslips. The coverslips were coated on one side (S2) cured at 50 °C for 24 h, contact angles were taken. Then the other side (S1) of the coverslips were coated and cured for 24 h and contact angles were determined.



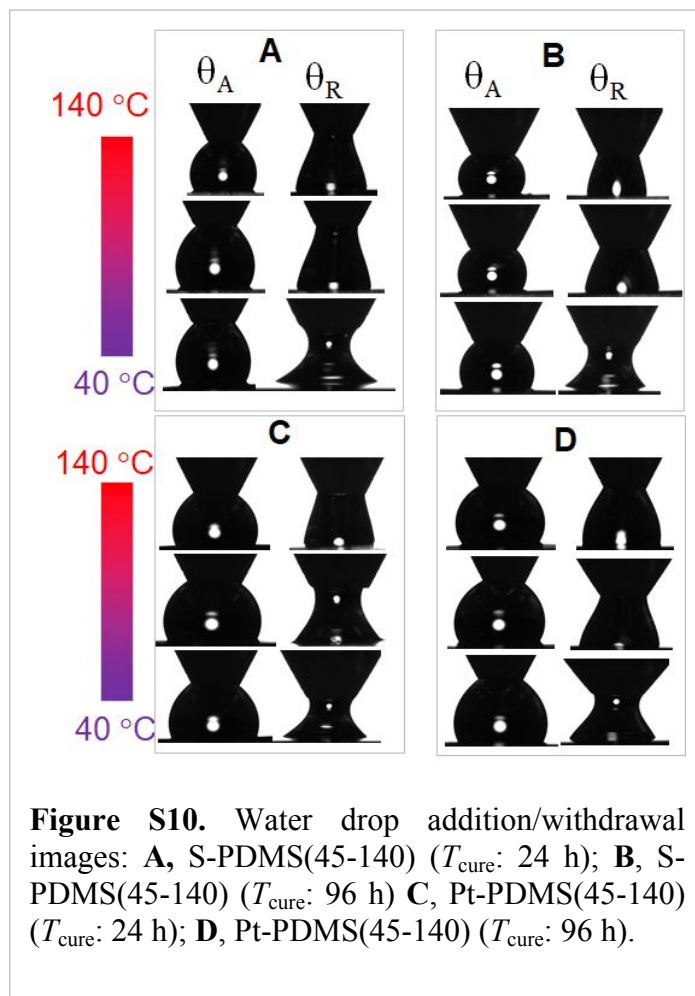

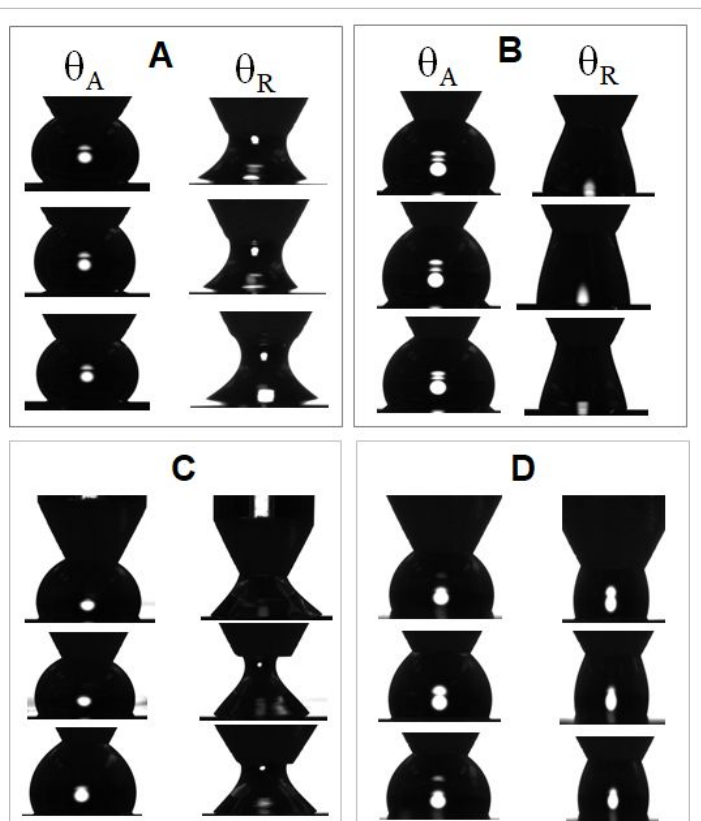

**Figure S11.** Water drop addition/withdrawal images for controls: **A**, S-PDMS(45); **B**, S-PDMS(140); **C**, Pt-PDMS(45) and **D**, Pt-PDMS(140). One-sided coatings were cured on microscope slides at uniform temperatures.

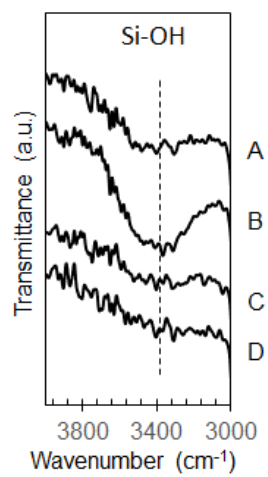

**Figure S12.** ATR-IR spectra: One year old samples of **A**, S-PDMS(25) and **C**, S-PDMS(100); **B** and **D** are after immersion of the respective coatings in water.
